# Supplementary material for: Anion-Exchange Chromatography at the Service of Gene Therapy: Baseline Separation of Full/Empty Adeno-Associated Virus Capsids by Screening of Conditions and Step Gradient Elution Mode
Source: MDPI journal article supplement (doi:10.3390/ijms232012332), 2022-10-15

# Supporting Information

## TABLE OF CONTENTS

|                  |                                              |    |
|------------------|----------------------------------------------|----|
| <b>Figure S1</b> | Comparison of different column hardware..... | S1 |
| <b>Figure S2</b> | Sample stability study over 7 days.....      | S2 |
| <b>Figure S3</b> | Screening of AEX analysis flow rate.....     | S3 |

**Figure S1.** Comparison of different column hardware. Empty (red line), full (blue line) and mixture of full and empty (violet line) rAAV8 capsids analysed in AEX mode by using 4 different column hardware, namely PP (A), PS (B), AX (C), and QS (D). Gradient conditions: reference linear gradient consisting of BTP buffer pH 9.0 in combination with NaCl as eluent salt. Acronyms legend: E = empty rAAV8 capsid, F = full rAAV8 capsid, Rs = peak resolution, F/E = full/empty ratio.

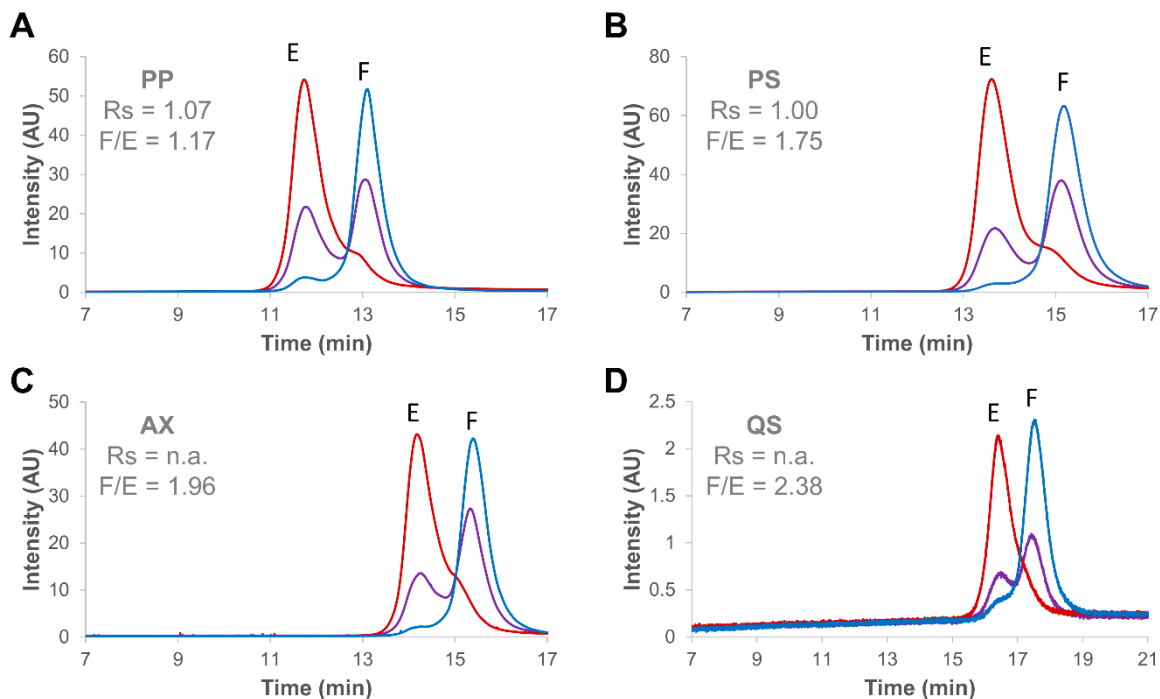

**Figure S2.** Sample stability study over 7 days. Samples consisting of full/empty mixture (panels A and B), full (panels C and D), and empty (panels E and F) rAAV8 capsids were diluted in water (panels A, C, E) and PBS buffer enriched with 0.001% poloxamer 188 (panels B, D, F) and analyzed at 0 (blue), 1 (green), 3 (orange), and 7 (yellow) days after dilution. Acronyms legend: E = empty rAAV8 capsid, F = full rAAV8 capsid.

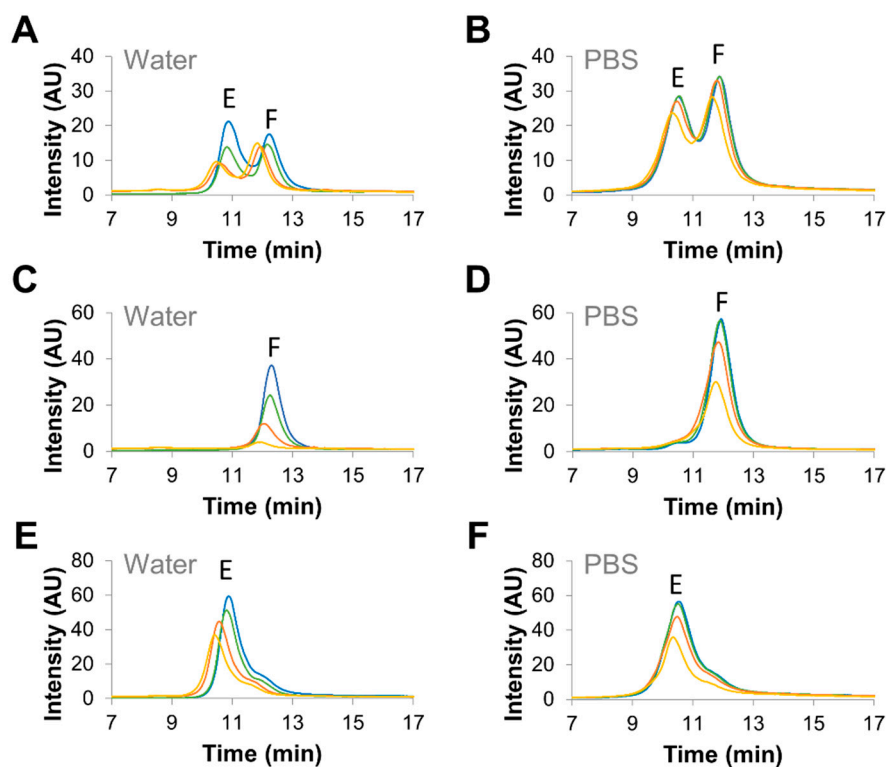

Summary of the chromatographic parameters related to the rAAV8 stability study:

|                               | $t_R$ empty (min) | $t_R$ full (min) | F/E ratio | Area empty (AU) | Area full (AU) | Resolution |
|-------------------------------|-------------------|------------------|-----------|-----------------|----------------|------------|
| <b>Dilution in water</b>      |                   |                  |           |                 |                |            |
| Day 0                         | 10.88             | 12.23            | 0.89      | 21.21           | 17.55          | 1.03       |
| Day 1                         | 10.83             | 12.17            | 1.06      | 13.85           | 14.62          | 1.09       |
| Day 3                         | 10.60             | 11.95            | 1.37      | 9.11            | 14.04          | 1.08       |
| Day 7                         | 10.47             | 11.84            | 1.38      | 9.60            | 15.02          | 1.08       |
| SD                            | 0.19              | 0.18             | 0.24      | 5.60            | 1.55           | 0.03       |
| Average                       | 10.69             | 12.05            | 1.18      | 13.44           | 15.31          | 1.07       |
| RSD (%)                       | 1.8%              | 1.5%             | 20.5%     | 41.7%           | 10.1%          | 2.5%       |
| <b>Dilution in PBS buffer</b> |                   |                  |           |                 |                |            |
| Day 0                         | 10.51             | 11.87            | 1.09      | 28.40           | 34.24          | n.a.       |
| Day 1                         | 10.55             | 11.87            | 1.09      | 28.56           | 34.18          | n.a.       |
| Day 3                         | 10.47             | 11.78            | 1.12      | 27.01           | 33.03          | n.a.       |
| Day 7                         | 10.32             | 11.64            | 1.17      | 23.75           | 28.38          | n.a.       |
| SD                            | 0.10              | 0.11             | 0.04      | 2.23            | 2.78           | /          |
| Average                       | 10.46             | 11.80            | 1.12      | 26.93           | 32.46          | /          |
| RSD (%)                       | 0.9%              | 1.0%             | 3.4%      | 8.3%            | 8.6%           | /          |

**Figure S3.** Screening of mobile phase flow rate. Mixture of full and empty rAAV8 capsids analysed in AEX mode by using three different flow rates, namely 0.7 mL/min (grey line), 0.3 mL/min (green line), and 0.1 mL/min (orange line). Gradient conditions: optimized linear gradient consisting of AMPSO buffer pH 9.4 in combination with TMAC as eluent salt.

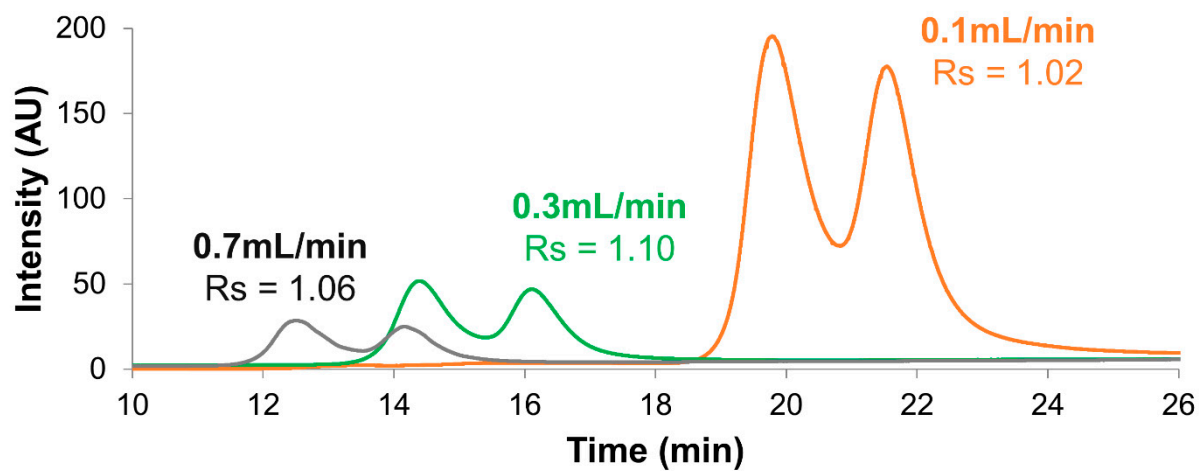

Supplement: s1 [file s1]
